1  
2  
3  
4  
5  
6  
7  
8  
9  
10  
11  
12  
13  
14  
15  
16  
17  
18  
19  
20  
21

ACE-2-like enzymatic activity is associated with immunoglobulin in COVID-19 patients

Yufeng Song<sup>1</sup>, Regan Myers<sup>1</sup>, Lila Murphy<sup>1,2</sup>, Bailey Brooks<sup>1,2</sup>, Jeffrey M. Wilson<sup>3</sup>,  
Alexandra Kadl<sup>4,5</sup>, Judith Woodfolk<sup>4</sup>, Steven L. Zeichner<sup>1,6\*</sup>

<sup>1</sup>Department of Pediatrics, University of Virginia

<sup>2</sup>College of Arts and Sciences, University of Virginia

<sup>3</sup>Division of Allergy and Clinical Immunology, Department of Medicine, University of Virginia

<sup>4</sup>Department of Medicine, University of Virginia

<sup>5</sup>Department of Pharmacology, University of Virginia

<sup>6</sup>Department of Microbiology, Immunology, and Cancer Biology, University of Virginia

\*Correspondence: [zeichner@virginia.edu](mailto:zeichner@virginia.edu)

## 22 **Abstract**

23 Many mechanisms responsible for COVID-19 pathogenesis are well-established, but  
24 COVID-19 includes features with unclear pathogenesis, such as autonomic  
25 dysregulation, coagulopathies, and high levels of inflammation. The receptor for SARS-  
26 CoV-2 spike protein's receptor binding domain (RBD) is angiotensin converting enzyme  
27 2 (ACE2). We hypothesized that some COVID-19 patients may develop antibodies that  
28 have negative molecular image of RBD sufficiently similar to ACE2 to yield ACE2-like  
29 catalytic activity – ACE2-like abzymes. To explore this hypothesis, we studied patients  
30 hospitalized with COVID-19 who had plasma samples available obtained about 7 days  
31 after admission. ACE2 is a metalloprotease that requires  $Zn^{2+}$  for activity. However, we  
32 found that the plasma from some patients studied could cleave a synthetic ACE2  
33 peptide substrate, even though the plasma samples were collected using disodium  
34 ethylenediaminetetraacetate (EDTA) anticoagulant. When we spiked plasma with  
35 synthetic ACE2, no ACE2 substrate cleavage activity was observed unless  $Zn^{2+}$  was  
36 added or the plasma was diluted to decrease EDTA concentration. After processing  
37 samples by 100 kDa size exclusion columns and protein A/G adsorption, which  
38 depleted immunoglobulin by >99.99%, the plasma samples did not cleave the ACE2  
39 substrate peptide. The data suggest that some patients with COVID-19 develop  
40 antibodies with abzyme-like activity capable of cleaving synthetic ACE2 substrate. Since  
41 abzymes can exhibit promiscuous substrate specificities compared to the enzyme  
42 whose active site image they resemble, and since proteolytic cascades regulate many  
43 physiologic processes, anti-RBD abzymes may contribute to some otherwise obscure  
44 COVID-19 pathogenesis.

45

46

## 47 **Introduction**

48 The primary pathology in COVID-19 involves pulmonary disease<sup>1-3</sup>. Other end organ  
49 involvement, likely directly attributable to infection with the virus, can include  
50 gastrointestinal disease, such as diarrhea, and loss of smell and taste<sup>2-4</sup>. While the  
51 basic pathophysiology of COVID-19 is well-established, COVID-19 has many baffling  
52 features, including disorders involving high inflammation, disorders of the clotting  
53 cascade, and problems with blood pressure homeostasis<sup>2, 5, 6</sup>. Some sequelae do not  
54 develop until a week or more after infection, suggesting that their pathogenesis may  
55 result from secondary processes.

56  
57 Reports suggest that some of the inflammatory processes associated with COVID-19  
58 may relate to antibodies against the SARS-CoV-2 spike protein, S. For example, small  
59 numbers of children who have received COVID-19 vaccines and have had no evidence  
60 of infection with SARS-CoV-2, as well as a small number of infants born to mothers with  
61 COVID-19<sup>7</sup> have been described as having multi-system inflammatory syndrome of  
62 children (MIS-C)<sup>8</sup>.

63  
64 In addition to acute COVID-19, some patients experience Post-Acute Sequelae of  
65 SARS CoV-2 infection (PASC, sometimes called “long COVID”), a heterogeneous group  
66 of symptoms that continue after acute infection has resolved and can include evidence  
67 of a hyperinflammatory state<sup>9</sup>, persistent coagulopathies, and neurophysiologic  
68 dysregulation, for example aberrant blood pressure regulation. While some clinical  
69 features observable at the beginning of the COVID-19 clinical course, such as SARS-  
70 CoV-2 viremia, autoantibodies, inflammatory markers, and activation of Epstein-Barr

71 Virus, may be associated with an increased risk of long COVID<sup>10</sup>, the detailed  
72 pathogenic processes responsible for PASC remain unclear.  
73  
74 Membrane-bound angiotensin converting enzyme 2 (ACE2) is the main cellular receptor  
75 for SARS-CoV-2. Binding of the SARS-CoV-2 spike protein receptor binding domain  
76 (RBD) to ACE2 initiates the pathway that leads to infection of a new host cell. ACE2, a  
77 Zn<sup>2+</sup> metalloenzyme, cleaves angiotensin II into angiotensin 1-7, which has vasodilatory  
78 activity. Angiotensin converting enzyme (ACE) cleaves angiotensin I to yield angiotensin  
79 II, which has vasoconstrictive and hypertensive effects. ACE2 therefore helps to  
80 counteract the hypertensive effects of angiotensin II, and so has blood pressure  
81 counterregulatory activity compared to ACE. There have been isolated reports and  
82 small case series describing persistent hypotension in patients with COVID-19 and  
83 patients with PASC without a clearly identified cause<sup>11-13</sup>.  
84  
85 The kallikrein-kinin system is a proteolytic cascade that helps regulate inflammation  
86 (reviewed in <sup>14</sup>). There is cross-talk between the coagulation, kallikrein-kinin,  
87 complement and renin-angiotensin systems<sup>15</sup>. Some patients with severe COVID-19  
88 respiratory disease have been found to have altered regulation of the kallikrein-kinin  
89 system in bronchoalveolar lavage fluid<sup>16</sup>. Abnormalities in the kallikrein-kinin system  
90 have been proposed as contributing to the pathogenesis of severe COVID-19<sup>17</sup>.  
91  
92 Catalytic antibodies, “abzymes”<sup>18, 19</sup>, are antibodies that have catalytic activity. When  
93 abzymes were first described, they generated considerable excitement. Investigators  
94 hypothesized that it would be possible to produce clinically and biotechnologically useful  
95 abzymes.

96

97 However, with additional studies, it became clearer that abzyme activity was  
98 significantly lower than the activity of more conventional enzymes ( $k_{cat}/K_m$  values  $\sim 10^2$   
99  $- 10^4 \text{ s}^{-1} \cdot \text{M}^{-1}$  vs.  $k_{cat}/K_m$  values of  $\sim 10^5 \text{ s}^{-1} \cdot \text{M}^{-1}$ )<sup>21</sup>. Hence, interest in the  
100 biotechnological applications of abzymes waned, but an appreciation of the potential  
101 role of abzymes in the pathogenesis of disease, including autoimmune disease,  
102 continued. High concentrations of abzymes in the circulation may compensate for the  
103 abzymes' lower activity to yield clinically significant effects.

104

105 Patients with autoimmune diseases can make abzymes catalyzing, for example,  
106 cleavage of vasoactive intestinal peptide (VIP)<sup>22</sup>, DNA<sup>23</sup>, immunoglobulin components<sup>24</sup>,  
107 components of the clotting cascade<sup>25-27</sup>, and myelin basic protein (MBP) in patients with  
108 multiple sclerosis<sup>28</sup>. Abzymes that cleave the HIV envelope protein have been observed  
109 to occur in patients with HIV, so there is precedence for the induction of a catalytic  
110 antibody by a virus<sup>29</sup>.

111

112 Investigators have deliberately made anti-idiotypic abzymes with catalytic activity like  
113 the activity of a particular enzyme of interest<sup>30, 31</sup>. Investigators identify an antibody  
114 against an enzyme, and then produce an antibody against the anti-enzyme antibody.  
115 For some of the anti-idiotypic antibodies, there is enough resemblance to the active site  
116 of the enzyme that the anti-idiotypic antibody has catalytic activity resembling the  
117 enzyme<sup>32, 33</sup>. In some instances, the substrate specificity of the abzyme differs  
118 substantially from that of the original enzyme<sup>31, 32, 34</sup>, with the abzyme showing more  
119 substrate promiscuity than the original enzyme.

120

121 The receptor binding domain of the SARS-CoV-2 spike protein uses the ACE2 enzyme  
122 on the surface of the target future host cell as its receptor. The RBD is not an antibody,  
123 but it does bind ACE2. Taking as an example of abzyme production the anti-idiotypic  
124 antibody to an antibody against an enzyme, it is plausible to hypothesize that in some  
125 cases, an antibody against the RBD might resemble the ACE2 active site and so have  
126 catalytic activity. If an antibody directed against the RBD has some resemblance to  
127 ACE2, it is also plausible that anti-RBD antibodies, for some small fraction of patients,  
128 might have catalytic activity reminiscent of ACE2. We hypothesized that some COVID-  
129 19 patients may develop anti-RBD antibodies, with promiscuous catalytic activity that, in  
130 some cases, cleaves substrates in patients to yield clinically significant effects. FIG 1  
131 outlines this hypothesis schematically. We therefore undertook a study to explore  
132 whether some COVID-19 patients might have antibodies that can cleave an ACE2  
133 substrate.

134

135 We studied plasma samples from a group of 67 patients, with samples obtained  
136 relatively early in their disease course, on about the 7th day of hospitalization. As a  
137 negative control we purchased pooled human plasma that was collected in late 2018,  
138 about a year before the first cases of COVID-19 were described. We tested plasma  
139 using an established fluorometric assay for ACE2 activity, which detects cleavage of an  
140 ACE2 peptide substrate. We found that some of the patients had ACE2 substrate  
141 peptide cleavage activity when the assay was run directly on disodium  
142 ethylenediaminetetraacetate (EDTA)-anticoagulated plasma samples, even though  
143 ACE2 is a metalloprotease that requires  $Zn^{2+}$  for activity. Recombinant ACE2 added to  
144 plasma did not show ACE2 substrate-cleaving activity unless  $ZnCl_2$  was added to  
145 samples at concentrations greater than the EDTA. Processing the samples through a

146 100 KDa size exclusion column followed by absorption with protein A/G beads, which  
147 depleted IgG by >99.99%, eliminated the ability of the samples to cleave the ACE2  
148 peptide substrate, supporting the hypothesis that a fraction of COVID-19 patients may  
149 develop antibodies that have ACE2 substrate cleavage activity.

150

151

## 152 **Methods**

### 153 **Clinical Cohort**

154 The clinical cohort was recently described in more detail in another publication<sup>35</sup>. The  
155 hypothesis motivating that work held that COVID-19 would lead to large scale  
156 reactivation of lymphotropic herpesviruses EBV and HHV-6, but the data obtained in  
157 the study did not support that hypothesis. In brief, the University of Virginia (UVA)  
158 enrolled a prospective cohort of moderate to severe COVID-19 adult patients admitted  
159 to the hospital with a diagnosis confirmed by a nucleic acid amplification test. Patients  
160 consented were entered into the study. Clinical data were entered into study databases.  
161 Plasma was collected into clinical standard lavender top (EDTA anticoagulant) tubes.  
162 Samples were processed in the UVA Biorepository and Tissue Facility and stored at -80  
163 C. Study participants (n=67) were adults ages 18 years and above. We used samples  
164 obtained on or about day 7 of hospitalization for this study, prior to anti-inflammatory  
165 drug administration. The predominant viral strain for our sample was the alpha strain  
166 with 98.51% of our sample (66 patients) being collected before July of 2021. The sample  
167 collection protocol was approved by the UVA IRB (HSR #200110), and approval was  
168 obtained to work on the specimens (HSR #HSR200362), and it follows the  
169 Strengthening the Reporting of Observational Studies in Epidemiology (STROBE)  
170 guidelines. EDTA-anticoagulated healthy normal donor plasma was purchased from  
171 Valley Biomedical (<http://www.valleybiomedical.com/>), (Pooled Human Plasma, Cat. No.  
172 HP1051PK2, Lot No. 21M2548). This lot of plasma was collected on December 12,  
173 2018 and December 13, 2018 (communication with Valley Biomedical technical  
174 support), about a year before the start of the COVID-19 pandemic, so it is extremely  
175 unlikely that the plasma was derived from any blood from patients infected with SARS-



176 CoV-2. Plasma was aliquoted and stored at -20°C according to manufacturer's

177 instructions.

178

### 179 **Angiotensin II Converting Enzyme (ACE2)-like Abzyme Activity Detection**

180 Abzyme catalytic activities in plasma samples were measured using an Angiotensin II

181 Converting Enzyme (ACE2) Activity Assay Kit, Fluorometric (Abcam, Cat. #ab273297)

182 according to the manufacturer's protocol. This assay employs a synthetic ACE2 peptide

183 substrate labeled with a fluor and a quencher. The manufacturer's product information

184 claims a lower limit of detection for an unmodified assay of 400  $\mu$ U. The manufacturer

185 does not release detailed information concerning the peptide substrate, holding that

186 information as a trade secret. The kit includes recombinant human ACE2 (ACE2) for

187 use as a positive control. 50 $\mu$ l plasma was added to wells in a 96-well black flat bottom

188 assay plate (Corning, Cat. #3603) and incubated at room temperature (RT), in the dark

189 for 15 min. Then, 50 $\mu$ l of substrate pre-diluted according to manufacturer's protocol was

190 added into the wells of the plate, mixing the substrate with the plasma sample. The

191 plate was immediately placed into a SpectraMax® M5 multi-model microplate reader

192 (Molecular Devices) and the Relative Fluorescent Unit (RFU, Ex/Em = 320/420 nm)

193 values were measured in kinetic mode every 20 min for a total of 16 hours at 37°C.

194 ACE2 inhibitor provided in the assay kit was also used for additional controls.

195

### 196 **Determination of ACE2 Substrate Peptide Cleavage Activity in Plasma Samples**

#### 197 **With and Without Added ZnCl<sub>2</sub> or Plasma Dilution**

198 To evaluate whether native ACE2 shed into blood<sup>36, 37</sup> could contribute to the catalytic

199 activity observed in the patient plasma samples, we investigated whether EDTA present

200 in the plasma samples inhibited activity of recombinant ACE2 spiked into the samples.  
201 EDTA can inhibit the catalytic activity of ACE2, a Zn<sup>2+</sup> metalloprotease<sup>38, 39</sup>.  
202  
203 We conducted serial 10-fold dilutions of the normal donor plasma in ACE2 assay buffer  
204 from the assay kit and then added and then added 2 μL recombinant positive control  
205 ACE2, provided as a positive control in the ACE2 assay kit (Abcam, Cat. #ab273297) to  
206 each well to the samples to the samples according to the manufacturer's protocol,  
207 conducting the ACE2 assays on the serially diluted samples with the added  
208 recombinant ACE2. We also added ZnCl<sub>2</sub> to some samples to achieve final  
209 concentrations ranging from 0 to 2 mM. Samples containing plasma, recombinant ACE2  
210 and ZnCl<sub>2</sub> mixture with pre-diluted ACE2 inhibitor served as negative comparisons.  
211 Then, 50 μL of substrate (pre-diluted according to manufacturer's protocol) was added  
212 into the wells. Relative Fluorescent Units were measured, and data was analyzed as  
213 described below.

214

### 215 **Human Immunoglobulin Depletion and Detection**

216 To deplete immunoglobulins from the samples, patient plasma samples or pooled  
217 healthy donor plasma were centrifuged at 12,000 g at 4 °C for 15 min and supernatants  
218 were passed through 0.45 μm syringe filter (FisherScientific, Cat. #97204) to remove  
219 contaminating particulate matter. We then placed 500 μL of the filtered samples into  
220 ultrafiltration columns with 100kDa cut-off ultrafiltration membrane (Pierce™ Cat. #  
221 88503) and centrifuged the columns at 12,000 × g at 4 °C until > 400 μL of filtrate was  
222 produced. To further deplete antibodies in the plasma samples, we then incubated the  
223 flow-through fractions with 30 μL pre-washed Protein A/G Magnetic Beads (Life  
224 Technologies, Cat. # 88803, 10 mg/mL) at room temperature (RT) for 1 hour, followed

225 by magnetic removal of the beads, and repeated the same incubation procedure with  
226 another freshly prepared 30  $\mu$ L magnetic beads. The resulting processed plasma  
227 samples were stored at 4°C for short times (less than 12 hours) or -20 °C for longer  
228 times. Human IgG was measured using a Human IgG ELISA Kit (Abcam, Cat.  
229 #ab100547) according to the manufacturer's protocol. We added 50  $\mu$ L processed  
230 samples, as well as standards to multi-microwell strips and incubated them at room  
231 temperature for 2.5 hours. Strips were washed with wash buffer and 50  $\mu$ L diluted  
232 biotin-labeled IgG detection antibody were then added to each well with subsequent  
233 HRP-streptavidin incubation after another wash step. Each incubation was performed at  
234 room temperature for at least 1 hour. After washing, 100  $\mu$ L of TMB One-Step Substrate  
235 was added to each well and was incubated for 5 to 15 min at room temperature in the  
236 dark with gentle shanking. The reaction was stopped by adding 50  $\mu$ L Stop Solution to  
237 each well. OD values were read at 450 nm using an accuSkan FC micro-well plate  
238 reader (ThermoFisher). IgG concentrations were calculated based on standard curves  
239 generated with the same batch of assay strips. Human IgM was measured using a  
240 Human IgM ELISA Kit (Invitrogen, Cat. #BMS2098) according to the manufacturer's  
241 protocol. Briefly, after washing the strips twice, we added 100  $\mu$ L processed samples,  
242 as well as standards together with 50  $\mu$ L HRP-conjugated antibody to multi-microwell  
243 strips and incubated them at room temperature for at least 1 hour. Strips were washed  
244 with wash buffer. After washing, 100  $\mu$ L of TMB One-Step Substrate was added to each  
245 well and was incubated for 5 to 15 min at room temperature in the dark with gentle  
246 shanking. The reaction was stopped by adding 100  $\mu$ L Stop Solution to each well. OD  
247 values were read at 450 nm using an accuSkan FC micro-well plate reader  
248 (ThermoFisher). IgM concentrations were calculated based on standard curves  
249 generated with the same batch of assay strips.

250

## 251 **RBD Binding Assays**

252 We measured IgG binding to the S-RBD in serum with a quantitative ImmunoCAP™-  
253 based system, employing a Phadia 250 (Thermo-Fisher/Phadia), as described<sup>40</sup>. In  
254 brief, we biotinylated S-RBD (RayBiotech, Peachtree Corners, GA) and conjugated it to  
255 streptavidin-coated ImmunoCAP™s (Thermo-Fisher/Phadia). We subtracted  
256 background signal by subtracting the signal due to unconjugated streptavidin  
257 ImmunoCAP™, which was run in parallel with each sample.

258

## 259 **Data Analysis**

260 Since the RFU values for the assays conducted on the samples reached 80% of  
261 maximum at about 240 min, RFU values observed over 240 min generated by an ACE2  
262 kit were used to evaluate ACE2 substrate cleavage activity in the plasma samples. For  
263 each sample, a value corrected for baseline fluorescence in the sample was obtained  
264 by the subtracting the baseline RFU value from the value at each subsequent time and  
265 the sum of the baseline-corrected RFU values over 240 min was calculated using Excel.  
266 Subsequent statistical analysis and data visualization was done using R (version 4.2.1)  
267 with the Rstudio environment and packages ggplot2, tidyverse, readr, drc, ggpubr,  
268 ggh4x, gridExtra, and scales. Samples with the top 20% and a control bottom 10% RFU  
269 values over 240 min were identified for antibody depletion and further assays.

270

271

## 272 Results

273 To develop assays with enhanced sensitivity for ACE2 substrate cleavage activity, we  
274 used a commercially available kit, in which a synthetic peptide ACE2 substrate labeled  
275 with a fluor and a quencher is exposed to sample. ACE2 substrate cleavage activity  
276 frees the fluor from quenching, followed by fluorometric evaluation over time. We first  
277 established the kit's performance characteristics on commercially purchased EDTA-  
278 anticoagulated normal human plasma. ACE2 is a Zn<sup>2+</sup>-requiring metalloenzyme. Since  
279 EDTA was used as the anticoagulant, to make Zn<sup>2+</sup> unavailable to the Zn<sup>2+</sup>-requiring  
280 metalloenzymes of the enzymes involved in the coagulation cascade, we first  
281 established whether exogenously added ACE2 could be detected when added to  
282 plasma samples under our assay conditions. We found that exogenously added  
283 recombinant ACE2 could not be detected, either using commercially obtained pooled  
284 plasma or in plasma samples pooled from our patients and obtained from our sample  
285 bank, unless Zn<sup>2+</sup> was added or unless the plasma was diluted (FIG 2). Since no native  
286 ACE2 activity should be detectable in the EDTA-anticoagulated plasma, any ACE2  
287 substrate cleavage activity observed in the EDTA-anticoagulated plasma should be due  
288 to something other than ACE or another Zn<sup>2+</sup> metalloprotease.

289  
290 We performed the ACE2 assay on EDTA-anticoagulated (obtained using clinical  
291 standard lavender top tubes) research participant plasma samples obtained at about the  
292 7<sup>th</sup> day of hospitalization for a cohort of 67 COVID-19 patients with moderate to severe  
293 disease. Using these samples, without dilution and without added Zn<sup>2+</sup>, we found that  
294 we could detect cleavage of the ACE2 peptide substrate in some of the patients,  
295 suggesting that the ACE2 peptide substrate cleavage activity was produced by an agent

296 with co-factor characteristics different from canonical ACE2 (FIG 3). FIG 4 shows a  
297 scatter plot of the RFU values for the 67 patients studied.

298  
299 To determine whether the ACE2 substrate cleavage activity was associated with the  
300 presence of immunoglobulin in the samples, we developed an immunoglobulin depletion  
301 protocol that includes an initial 0.45 um filtration step to remove large aggregates,  
302 followed by a 100 KDa size exclusion column chromatography step, and a subsequent  
303 staphylococcal A/G bead absorption step. To test whether patients with high RFU had  
304 ACE2 substrate cleavage activity associated with immunoglobulin, we selected samples  
305 from patients who had RFU values in the top 20% RFU values and which still had  
306 sufficient plasma samples remaining for the immunoglobulin depletion procedure and  
307 subsequent ACE2 assays. This selection yielded samples from 11 patients, 4, 5, 9, 11,  
308 13, 15, 27, 43, 44, 47, and 48. We also selected samples from 3 patients (17, 64, 64)  
309 who were among the patients having the bottom 10% of ACE2 substrate cleavage  
310 activity and for which sufficient sample was available for the immunoglobulin depletion  
311 procedure as negative control. To determine whether our immunoglobulin depletion  
312 procedure also depleted IgM in addition to IgG, selected additional samples for which  
313 there sufficient plasma remained for the assays, patients 4, 5, 11, 13, 15, 27, 43, 44, 64,  
314 and the pooled healthy donor plasma, and determined IgM concentrations before and  
315 after immunoglobulin depletion. We also included a purchased pooled EDTA-  
316 anticoagulated plasma sample as an additional control. For both IgG and IgM, we found  
317 that our depletion procedure removed more than 99.99% of the immunoglobulins.

318  
319 Table 2 show the results of the immunoglobulin depletion protocol applied to the patient  
320 plasma samples from these patients. The process depleted IgG by a factor of

321 >>99.99%, leaving IgG in the samples at <2.5 ng/ml for all samples. Table 3 shows the  
322 results of assays for IgM run on selected samples for which sufficient sample remained  
323 for the assays. For all samples assayed, the immunoglobulin depletion procedure  
324 removed >99.9% of IgM.

325

326 We then re-assayed these samples to determine whether immunoglobulin depletion  
327 was associated with elimination of the ACE2 substrate cleavage activity (FIG 5), and  
328 found that for the 11 tested patients with ACE2 substrate cleavage activity in this cohort,  
329 depletion of the immunoglobulin was accompanied by elimination of ACE2 substrate  
330 cleavage activity.

331

332 If our hypothesis is correct and the ability to cleave an ACE2 substrate is related to Abs  
333 against the RBD, then we should be able to observe a correlation between ACE2  
334 substrate cleavage activity and the amount of Ab directed against the RBD in the  
335 patients' samples. We assayed for anti-RBD Ab binding activity using a modification of  
336 an ImmunoCAP™ Assay activity using a Phadia 250 instrument and S-RBD (FIG 6). We  
337 found that there was a significant correlation between the amount of Ab in the patient  
338 plasma samples capable of binding the RBD and the ACE2 substrate cleavage activity,  
339 suggesting that the ACE2 cleavage activity was related to the amount of anti-RBD Ab  
340 present in the plasma sample.

341

342

343

344

## 345 **Discussion**

346 Our experiments indicate that a fraction of patients with COVID-19 have an activity in  
347 plasma capable of cleaving a substrate for ACE2. The ACE2 substrate cleavage activity  
348 has divalent cation requirements different from native ACE2 and collocates with  
349 immunoglobulin presence during an immunoglobulin depletion procedure, suggesting  
350 that these patients may have antibodies with abzyme activity.

351  
352 The ACE2 substrate cleavage activity showed a significant correlation with Ab directed  
353 against the RBD, further supporting the hypothesis that some anti-RBD Abs have ACE2  
354 substrate cleavage activity, but there was considerable spread in the identification of  
355 ACE2 substrate cleavage activity observed for different levels of anti-RBD Ab. However,  
356 this spread would be expected if only a small fraction of Abs elicited against the RBD in  
357 fact had ACE2 substrate cleavage activity, with the initiation and maturation of Ab  
358 responses directed against the RBD resulting, in part, from non-specific processes.

359  
360 Since abzymes can have a broadened substrate specificity compared to the original  
361 enzyme that they mirror, it is possible that abzymes made in response to SARS-COV-2  
362 infection may cleave a range of substrates, including substrates that form components  
363 of important regulatory cascades, like clotting, blood pressure regulation, and  
364 inflammation processes, which could account for aspects of COVID-19 that cannot be  
365 directly attributed to viral infection and cell and tissue destruction.

366  
367 Our study had several strengths. We studied a moderate number of patients, with  
368 samples collected prospectively from acutely hospitalized patients with clearly  
369 established COVID-19 relatively early in their disease course, but likely approaching at



370 least 2 weeks following initial infection. The patients almost certainly were not admitted  
371 immediately following initial infection and the samples were obtained about a week after  
372 admission, providing enough time for the development of an initial antibody response to  
373 SARS-CoV-2 infection. We used a standard, widely-employed kit for ACE2 peptide  
374 substrate cleavage activity, standard size exclusion columns, protein A/G bead  
375 absorption immunoglobulin depletion techniques, and assays for immunoglobulins. The  
376 data showing that the ACE2 substrate cleavage activity was present even when there  
377 was sufficient EDTA to chelate the  $Zn^{2+}$  essential for ACE2 activity suggests that the  
378 ACE2 substrate cleavage activity had important characteristics different from native  
379 ACE2. The data that the ACE2 substrate cleavage activity was removed from the  
380 samples following processing with size exclusion columns and absorption with protein  
381 A/G beads suggests that the non-  $Zn^{2+}$ -requiring ACE2 substrate cleavage activity co-  
382 localizes with immunoglobulin and the data that ACE2 substrate cleavage activity  
383 correlated with Ab against the RBD support the hypothesis that the patients with ACE2  
384 substrate cleavage activity may have developed abzymes with this activity.

385

386 However, our study has several limitations. We only studied a limited subset of the  
387 patients admitted to our hospital, from patients who consented to the sample banking  
388 and study and for whom sufficient sample volumes were available. A  
389 contemporaneously collected, matched, prospective set of samples from patients  
390 without COVID-19 would have been ideal negative controls, but samples from such  
391 subjects were not obtained as part of the sample banking effort. We also only  
392 conducted the assays on patient samples obtained at a single time, about 7 days after  
393 hospitalization, so we have no data from patients who were discharged, transferred, or  
394 died prior to day 7 of hospitalization. For this study, we were unable to correlate the

395 presence of ACE-2 abzyme activity with clinical disease features. More importantly, in  
396 this study we have no data from patients later in their disease course or following  
397 convalescence from the acute disease. Inflammatory, coagulopathic, and physiologic  
398 dysregulatory phenomena predominate in the later stages of COVID-19 and at least  
399 some aspects of PASC and MIS-C appear to result from immune-mediated phenomena.  
400 However, some of these patients are treated with anti-inflammatory agents, including  
401 intravenous immunoglobulin, which would make the study of these patients for abzyme-  
402 like activity difficult. If abzymes with promiscuous substrate specificities develop in some  
403 COVID-19 patients, some of the clinical features of those disorders could potentially be  
404 attributed to abzymes, but this study is not able to directly address such additional  
405 hypotheses, which would require additional work. In addition, since abzymes can show  
406 substantial substrate specificity spread, it is possible that additional patients in our  
407 cohort had abzymes with substrate specificity sufficiently divergent from  
408 angiotensinogen that it was not detectable using our assay. It is also possible that  
409 COVID-19 patients develop anti-RBD antibodies with abzyme-like activity, but that these  
410 antibodies have no clinical significance. Some fraction of normal individuals may have  
411 ACE2-like abzyme activity, but this activity could have been diluted in the purchased  
412 pooled normal control plasma. However, if the abzyme activity in such patients was  
413 similar to that observed in the individual positive patients in this study, that activity would  
414 still be ~15% of the activity of the positive patients, given the prevalence of detectable  
415 abzyme activity in our cohort, and so would have been likely detectable.

416

417 Finally, our study is merely associational. It is possible that we depleted some other,  
418 non-immunoglobulin component of COVID-19 patient plasma that has the ability to  
419 cleave the ACE2 substrate peptide with our 100 kDa size exclusion plus protein A/G

420 treatment procedure. To unequivocally establish that some COVID-19 patients develop  
421 anti-SARS-CoV-2 immune responses that include abzymes, it would be necessary to  
422 isolate discrete monoclonal antibodies from patients with ACE2 substrate cleavage  
423 activity, and then characterize those monoclonal antibodies in detail. Such work lies  
424 outside the perimeters of this current study. It is also possible that some COVID-19  
425 patients do, in fact, develop abzymes (ACE2-like – or with other catalytic activity), but  
426 that these abzymes have no clinical significance. Additional studies of potential abzyme-  
427 like activity in COVID-19 patients with different clinical disease manifestations and at  
428 different points in their disease course, including long after acute COVID-19, would be  
429 needed to establish the overall significance of abzymes in COVID-19 disease. While  
430 understanding the detailed pathogenic significance of abzymes in COVID-19 still  
431 requires substantial investigation, the existence of abzymes in COVID-19 is increasingly  
432 well-established. In addition to the studies reported here, McConnell and co-workers <sup>41</sup>  
433 recently described the existence of abzymes in convalescent plasma COVID-19  
434 patients capable of cleaving spike protein with virus neutralization. That two different  
435 groups independently found evidence of abzyme activity in plasma from COVID-19  
436 patients provides significant support for the hypothesis that COVID-19 patients can  
437 develop antibodies with proteolytic activity.

438

439 Nevertheless, our study offers potential additional insight into some of the difficult-to-  
440 understand clinical features of COVID-19, and if some of the difficult manifestations of  
441 COVID-19 are related to the induction of antibodies with abzyme-like activity, that  
442 finding may suggest new therapeutic interventions. Some other viruses also have also  
443 evolved to use enzymes located on the target host cell surface as their receptors, so it  
444 is conceivable that those other viral infections may also elicit clinically problematic anti-

445 viral antibodies. The number of spike protein RBDs presented to the immune system in  
446 a natural infection is vastly greater than the number of RBDs presented to the immune  
447 system following vaccination, offering many more opportunities for the induction of wide-  
448 ranging antibody responses, unlike the antigen exposure resulting from vaccination.  
449 While complications following vaccination are very rare and the risk-benefit calculation  
450 greatly favors vaccination, some of the adverse side effects of SARS-CoV-2 vaccines  
451 might also be attributable to the rare induction of anti-RBD antibodies with catalytic  
452 activity.

453

454 **Institutional Review Board Statement:** The sample collection protocol was approved  
455 by the UVA IRB (HSR #200110), and approval was obtained to work on the specimens  
456 (HSR #HSR200362).

457

458 **Informed Consent Statement:** Informed consent was obtained from all participants  
459 involved in the study.

460 **Data Availability Statement:** Data is presented in the manuscript and the  
461 supplements. Raw data can be obtained on request.

462

463 **Acknowledgments and Funding:** The study was supported by internal funding from  
464 the University of Virginia, including the Manning Fund for COVID-19 Research at UVA  
465 the Ivy Foundation, the Pendleton Laboratory Fund for Pediatric Infectious Disease  
466 Research, a College Council Minera Research Grant, the Coulter Foundation, and  
467 NIAID, NIH (R01 AI176515) with sample acquisition costs supported by the HHV-6  
468 Foundation. We thank the study participants for graciously agreeing to be research  
469 participants, and the research support staff who enrolled the study participants (led by

470 Linda Bailes RN, Allison Raymond RN and Sarah Struchen RN). We also thank the  
471 University of Virginia Biorepository and Tissue Research Facility for processing the  
472 samples used in the study and for providing specimens (Technical Director, Patcharin  
473 Pramoonjago PhD).

474

475 **Conflicts of Interest:** The authors declare no conflict of interest.

476

477 **Tables and Figures**

478

479

480

| <b>Table 1. Patient Demographic and Clinical Characteristics (cohort previously described in <sup>35</sup>)</b> |                              |
|-----------------------------------------------------------------------------------------------------------------|------------------------------|
| (IQR: interquartile range)                                                                                      |                              |
| <b>Characteristic</b>                                                                                           | <b>N = 67, median, (IQR)</b> |
| <i>Age at Admission</i>                                                                                         | 60 (48, 66)                  |
| <i>First Weight (kg)</i>                                                                                        | 91 (76, 112)                 |
| Unknown                                                                                                         | 1                            |
| <i>Height (m)</i>                                                                                               | 1.68 (1.60, 1.83)            |
| Unknown                                                                                                         | 6                            |
| <i>Gender</i>                                                                                                   |                              |
| Female                                                                                                          | 28 (42%)                     |
| Male                                                                                                            | 39 (58%)                     |
| <i>Race</i>                                                                                                     |                              |
| African American                                                                                                | 23 (34%)                     |
| Native American                                                                                                 | 1 (1.5%)                     |
| Caucasian                                                                                                       | 31 (46%)                     |
| Other                                                                                                           | 12 (18%)                     |
| <i>Smoking Status</i>                                                                                           |                              |
| Current                                                                                                         | 1 (2.1%)                     |
| Former                                                                                                          | 14 (29%)                     |
| Never                                                                                                           | 24 (50%)                     |
| Unknown                                                                                                         | 9 (19%)                      |
| NA                                                                                                              | 19                           |
| <i>Need for ICU</i>                                                                                             |                              |
| No                                                                                                              | 28 (42%)                     |
| Yes                                                                                                             | 39 (58%)                     |
| <i>Need for Intubation</i>                                                                                      |                              |
| No                                                                                                              | 41 (61%)                     |
| Yes                                                                                                             | 26 (39%)                     |
| <i>Blood Type</i>                                                                                               |                              |
| A-                                                                                                              | 2 (4.8%)                     |
| A+                                                                                                              | 14 (33%)                     |
| AB+                                                                                                             | 1 (2.4%)                     |
| B+                                                                                                              | 3 (7.1%)                     |
| O-                                                                                                              | 1 (2.4%)                     |
| O+                                                                                                              | 21 (50%)                     |
| Not determined                                                                                                  | 25                           |
| <i>Highest Temperature</i>                                                                                      |                              |
| <38                                                                                                             | 42 (49%)                     |
| 101                                                                                                             | 12 (18%)                     |
| >38.5                                                                                                           | 12 (18%)                     |
| >40                                                                                                             | 1 (1.5%)                     |
| <i>Length of Stay (Days)</i>                                                                                    | 10 (5, 22)                   |
| <i>Time to Death (Days)</i>                                                                                     |                              |
| 6                                                                                                               | 1                            |
| 10-20                                                                                                           | 2                            |
| 20-30                                                                                                           | 3                            |
| >30                                                                                                             | 2 (                          |
| <i>Highest D-Dimer</i>                                                                                          | 605 (280, 2,074)             |
| <i>Highest CRP</i>                                                                                              | 10 (4, 16)                   |
| <i>BMI</i>                                                                                                      | 33 (27, 38)                  |
| <i>Need for Vasopressors</i>                                                                                    |                              |
| Yes                                                                                                             | 44 (66%)                     |
| <i>Dexamethasone</i>                                                                                            |                              |
| Yes                                                                                                             | 41 (61%)                     |
| <i>Prednisone</i>                                                                                               |                              |
| Yes                                                                                                             | 3 (13%)                      |
| <i>Methylprednisolone</i>                                                                                       |                              |
| Yes                                                                                                             | 5 (22%)                      |
| <i>Tocilizumab</i>                                                                                              |                              |
| Yes                                                                                                             | 4 (6%)                       |
| <i>Remdesivir</i>                                                                                               |                              |
| Yes                                                                                                             | 27 (40%)                     |
| <i>Creatinine</i>                                                                                               | 1.00 (0.80, 1.45)            |
| <i>Hgb</i>                                                                                                      | 12.4 (10.8, 13.6)            |
| <i>IFNa3</i>                                                                                                    | 45 (36, 72)                  |
| Not determined                                                                                                  | 45                           |
| <i>Highest Ferritin</i>                                                                                         | 1277 (7, 7161)               |
| Not determined                                                                                                  | 5                            |
| <i>Highest Troponin</i>                                                                                         |                              |
| <0.04                                                                                                           | 47 (73%)                     |
| 0.04-0.4                                                                                                        | 12 (18%)                     |
| >0.6                                                                                                            | 3 (5%)                       |
| Not determined                                                                                                  | 5                            |
| <i>Highest Creatinine</i>                                                                                       | 1.10 (0.90, 1.80)            |

556 Table 2. Plasma IgG concentration before and after antibody depletion for selected  
557 patients exhibiting ACE2 substrate cleavage activity in FIG 2, then re-assayed for ACE2  
558 substrate cleavage activity with results shown in FIG 4.  
559

560

| Patient<br>(#) | IgG Concentration         |                            | IgG depletion<br>efficiency<br>(%) |
|----------------|---------------------------|----------------------------|------------------------------------|
|                | Pre <sup>a</sup><br>mg/ml | Post <sup>b</sup><br>ng/ml |                                    |
| 4              | 14.62                     | 0.67                       | >99.99%                            |
| 5              | 12.50                     | 1.48                       | >99.99%                            |
| 9              | 24.40                     | 0.96                       | >99.99%                            |
| 11             | 75.41                     | 0.17                       | >99.99%                            |
| 13             | 26.35                     | 2.46                       | >99.99%                            |
| 15             | 13.27                     | 2.47                       | >99.99%                            |
| 27             | 10.53                     | 2.40                       | >99.99%                            |
| 43             | 29.07                     | 0.87                       | >99.99%                            |
| 44             | 11.17                     | 2.29                       | >99.99%                            |
| 47             | 13.15                     | 1.85                       | >99.99%                            |
| 48             | 12.32                     | 2.06                       | >99.99%                            |

561  
562  
563

a: IgG concentration in plasma before antibody depletion  
b: IgG concentration in plasma after antibody depletion by ultrafiltration and Protein A/G beads



564 Table 3. Plasma IgM concentration before and after antibody depletion for selected  
565 patients.  
566

| Patient (#)          | IgM Concentration (mg/ml) |                   | IgM Depletion Efficiency (%) |
|----------------------|---------------------------|-------------------|------------------------------|
|                      | Pre <sup>a</sup>          | Post <sup>b</sup> |                              |
| 4                    | 0.875                     | 1.43E-05          | >99.99%                      |
| 5                    | 0.753                     | 1.44E-05          | >99.99%                      |
| 11                   | 0.7916                    | 7.99E-06          | >99.99%                      |
| 13                   | 0.644                     | 1.41E-05          | >99.99%                      |
| 15                   | 2.250                     | 1.08E-05          | >99.99%                      |
| 27                   | 0.549                     | 1.40E-05          | >99.99%                      |
| 43                   | 1.560                     | 1.34E-05          | >99.99%                      |
| 44                   | 3.243                     | 1.41E-05          | >99.99%                      |
| 64                   | 0.915                     | 8.22E-06          | >99.99%                      |
| Pooled Healthy Donor | 0.4852                    | 1.3568E-05        | >99.99%                      |

567 a: IgM concentration in plasma before antibody depletion

568 b: IgM concentration in plasma after antibody depletion by ultrafiltration and Protein A/G beads

569

570

571 **Figure Legends**

572

573 FIG 1. Schematic diagram illustrating the hypothesis underlying the study. The SARS-  
574 COV-2 Spike Protein Receptor Binding Domain (RBD) binds ACE2 on the surface of a  
575 potential host cells. The RBD has a partial negative image of ACE2. Some antibodies  
576 against the RBD may then have a conformation sufficiently like ACE2 to have  
577 proteolytic activity similar to the proteolytic activity of ACE2. The hypothesis further  
578 suggests that the catalytic activity of some antibodies will have a substrate specificity  
579 like ACE2, but because the negative image of RBD present antibodies is imperfect,  
580 some antibodies with proteolytic activity will have an altered substrate specificity,  
581 potentially affecting multiple proteolytic regulatory cascades.

582

583 FIG 2. Inhibition of exogenously added recombinant ACE2 substrate cleavage activity in  
584 undiluted EDTA-anticoagulated pooled plasma samples with and without added ZnCl<sub>2</sub>.  
585 ACE2 is a Zn<sup>2+</sup> metalloprotease. In this ACE2 spiking experiment, no ACE2 activity was  
586 detectable when exogenous ACE2 was added to the plasma, unless Zn<sup>2+</sup> was also  
587 added, or unless the plasma was diluted prior to the addition of the spiked-in ACE2.  
588 Adding an ACE2 inhibitor blocked detection of the ACE2 activity in all conditions,  
589 indicating that the activity was specific for ACE2. The findings indicate that no native  
590 ACE2 activity should be detectable in the EDTA-anticoagulated plasma and so any  
591 ACE2 substrate cleavage activity observed in the EDTA-anticoagulated plasma should  
592 be due to something other than ACE or another Zn<sup>2+</sup> metalloprotease.

593

594 FIG 3. Survey of ACE2 substrate cleavage activity in plasma from 67 patients with  
595 COVID-19 sampled at about day 7 of hospitalization. The plots present the results of the  
596 fluorometric assays for ACE2 substrate cleavage activity run on the 67 patients, plus

597 control samples. Several patients, including the 11 patients we selected for further study  
598 (4, 5, 9, 11, 13, 15, 27, 43, 44, 47, 48) because they had among the top 20% of RFU  
599 values and had sufficient plasma sample remaining for the immunoglobulin depletion  
600 protocol, showed an ability to cleave ACE2 substrate. (HDP: commercially purchased  
601 pooled healthy donor plasma; HDP+P.C: HDP with added recombinant human ACE2;  
602 HDP+P.C+I: HDP+P.C.+ ACE2; inhibitor; P.P.P alone: pooled plasma from negative  
603 samples).

604

605 FIG 4. Scatter plot of the background corrected RFU values for the plasma samples  
606 from the 67 patients evaluated in this study. The top 20% of values are plotted in red,  
607 the middle 70% are plotted in black, and the bottom 10% are plotted in blue. The top  
608 20% and bottom 10% were selected for the ACE2 substrate cleavage activity assays  
609 before and after immunoglobulin depletion shown in FIG 5.

610

611 FIG 5. ACE2 substrate cleavage activity in patients before and after immunoglobulin  
612 depletion. The figure shows ACE2 substrate cleavage activity for 11 patients (4, 5, 9,  
613 11, 13, 15, 27, 43, 44, 47, 48) who had among the top 20% of RFU values and for which  
614 we had sufficient plasma for immunoglobulin depletion, before (blue points) and after  
615 (red points) immunoglobulin depletion by a 100 KDa size exclusion column followed by  
616 protein A/G bead absorption. We also show ACE2 substrate cleavage activity assays  
617 before and after immunoglobulin depletion for pooled patient plasma (PPP) negative  
618 controls and samples from three arbitrarily selected patients, 17, 64, 65, that had among  
619 the bottom 10% of RFU values and had sufficient plasma remaining for the  
620 immunoglobulin depletion protocol. The data suggest that for the 11 patients

621 demonstrating ACE2 substrate cleavage activity in this cohort, the ACE2 substrate

622 cleavage activity was depleted in an immunoglobulin-associated manner.

623

624 FIG 6. Correlation of ACE2 substrate cleavage activity (ACE2 Activity) with anti-RBD

625 antibody (Ab Against RBD) in patient plasma. Anti-RBD antibody concentrations in

626 plasma samples were determined using ImmunoCAP™ antibody binding assay. The

627 negative control pooled human plasma is indicated by the red symbol. The patient

628 plasma samples are indicated in green. The negative control plasma values were

629 omitted in the calculation of the r- and p-values.

630

631 FIG 1. FIG 1. Schematic diagram illustrating the hypothesis underlying the study. The  
632 SARS-COV-2 Spike Protein Receptor Binding Domain (RBD) binds ACE2 on the  
633 surface of a potential host cells. The RBD has a partial negative image of ACE2. Some  
634 antibodies against the RBD may then have a conformation sufficiently like ACE2 to  
635 have proteolytic activity similar to the proteolytic activity of ACE2. The hypothesis further  
636 suggests that the catalytic activity of some antibodies will have a substrate specificity  
637 like ACE2, but because the negative image of RBD present antibodies is imperfect,  
638 some antibodies with proteolytic activity will have an altered substrate specificity,  
639 potentially affecting multiple proteolytic regulatory cascades.  
640  
641  
642

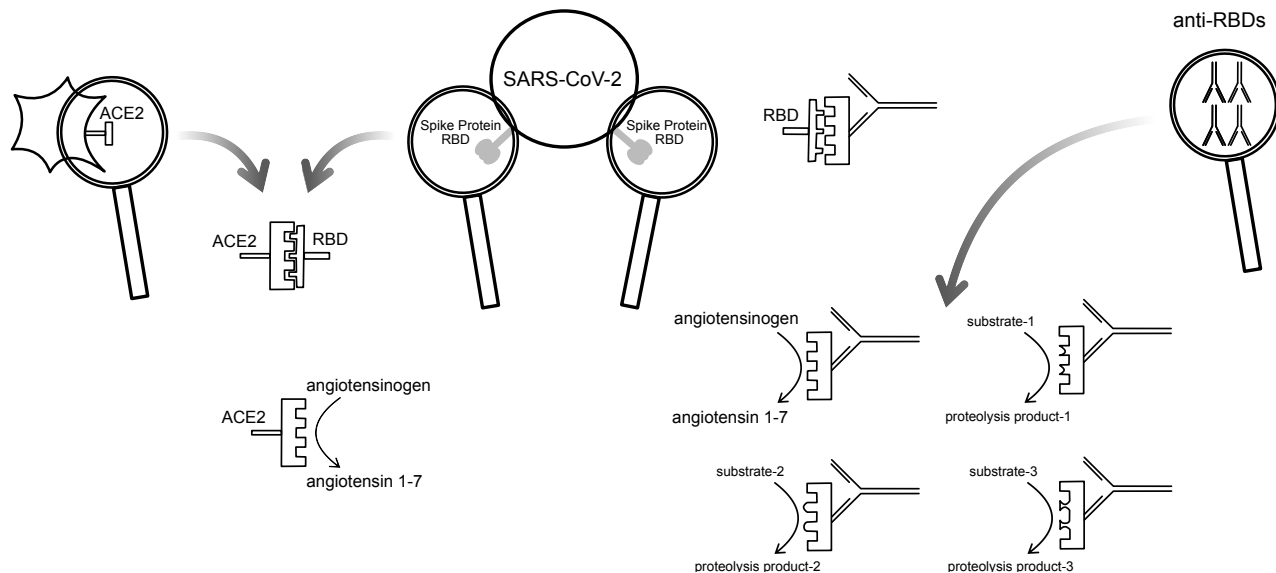

643  
644

645 FIG 2. Inhibition of exogenously added recombinant ACE2 substrate cleavage activity in  
646 undiluted EDTA-anticoagulated pooled plasma samples with and without added  $ZnCl_2$ .  
647 ACE2 is a  $Zn^{2+}$  metalloprotease. In this ACE2 spiking experiment, no ACE2 activity was  
648 detectable when exogenous ACE2 was added to the plasma, unless  $Zn^{2+}$  was also  
649 added, or unless the plasma was diluted prior to the addition of the spiked-in ACE2.  
650 Adding an ACE2 inhibitor blocked detection of the ACE2 activity in all conditions,  
651 indicating that the activity was specific for ACE2. The findings indicate that no native  
652 ACE2 activity should be detectable in the EDTA-anticoagulated plasma and so any  
653 ACE2 substrate cleavage activity observed in the EDTA-anticoagulated plasma should  
654 be due to something other than ACE or another  $Zn^{2+}$  metalloprotease.  
655

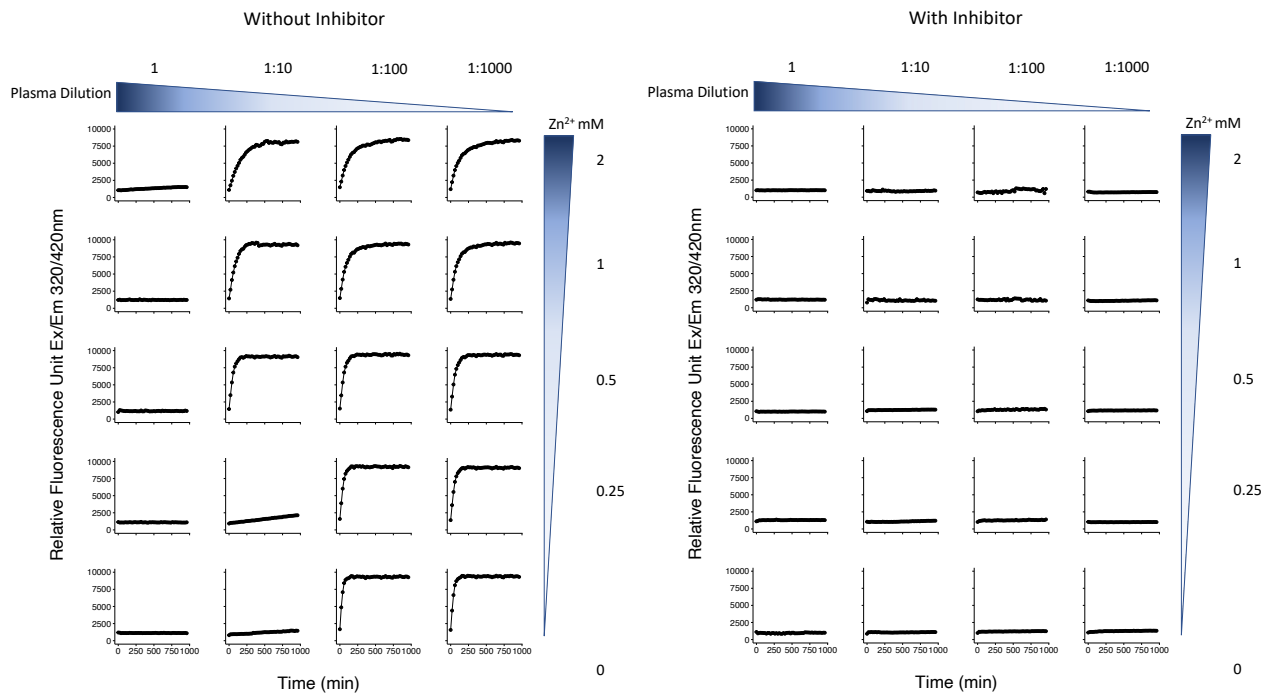

656  
657

658 FIG 3. Survey of ACE2 substrate cleavage activity in plasma from 67 patients with  
659 COVID-19 sampled at about day 7 of hospitalization. The plots present the results of the  
660 fluorometric assays for ACE2 substrate cleavage activity run on the 67 patients, plus  
661 control samples. We identified plasma from 11 patients (4, 5, 9, 11, 13, 15, 27, 43, 44,  
662 47, 48) that showed an ability to cleave ACE2 substrate. (HDP: commercially  
663 purchased pooled healthy donor plasma; HDP+P.C: HDP with added recombinant  
664 human ACE2; HDP+P.C.+I: HDP+P.C.+ ACE2; inhibitor; P.P.P alone: pooled plasma  
665 from negative samples).

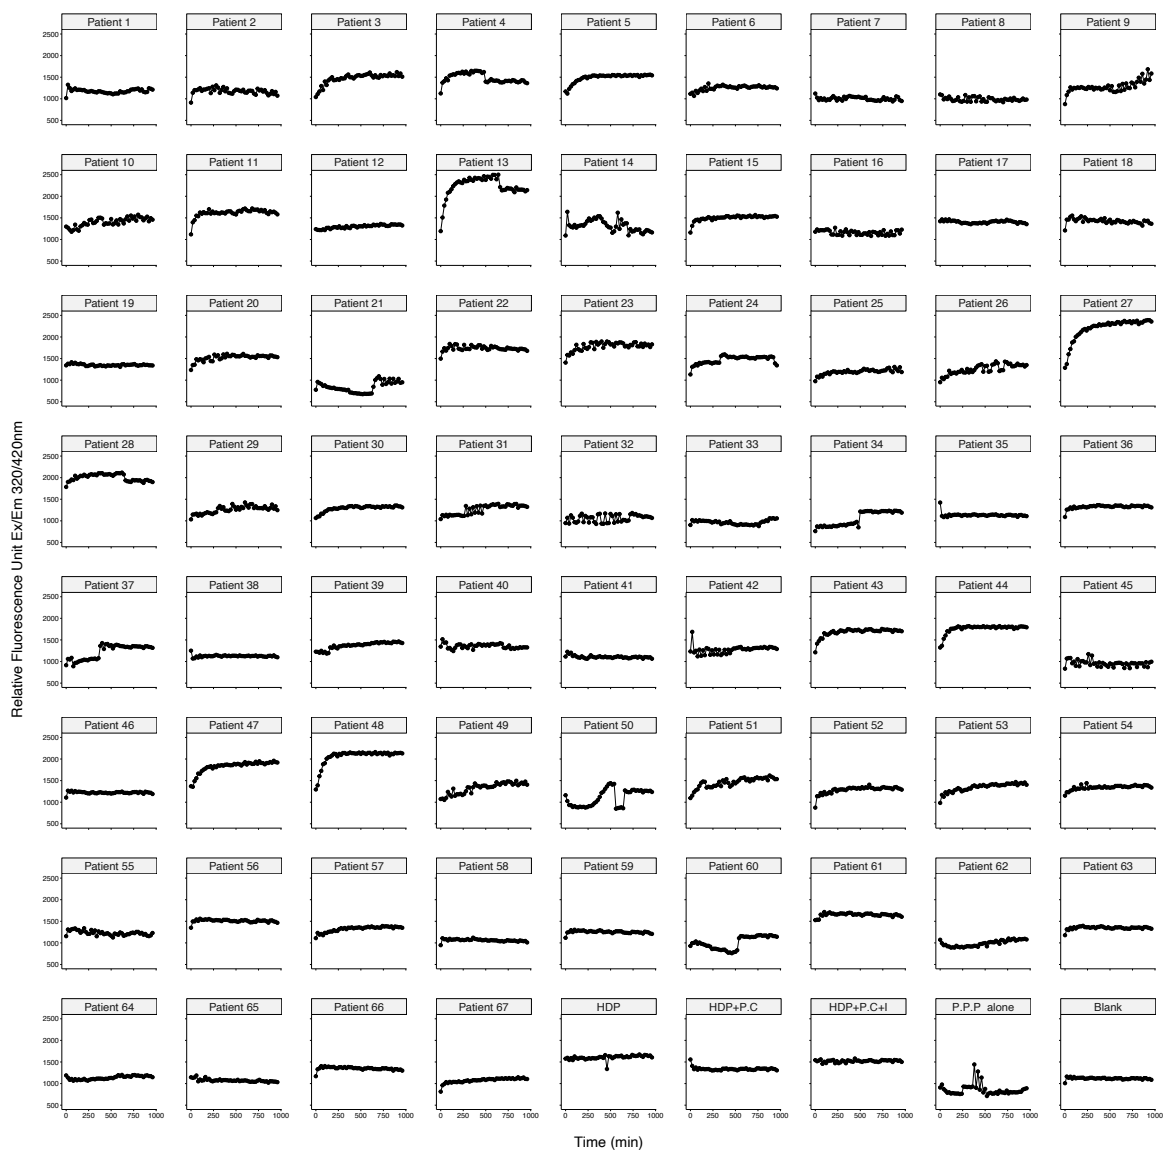

666  
667

668 FIG 4. Scatter plot of the background corrected RFU values for the plasma samples  
669 from the 67 patients evaluated in this study. The top 20% of values are plotted in red,  
670 the middle 70% are plotted in black, and the bottom 10% are plotted in blue. The top  
671 20% and bottom 10% were selected for the ACE2 substrate cleavage activity assays  
672 before and after immunoglobulin depletion shown in FIG 5.  
673  
674  
675

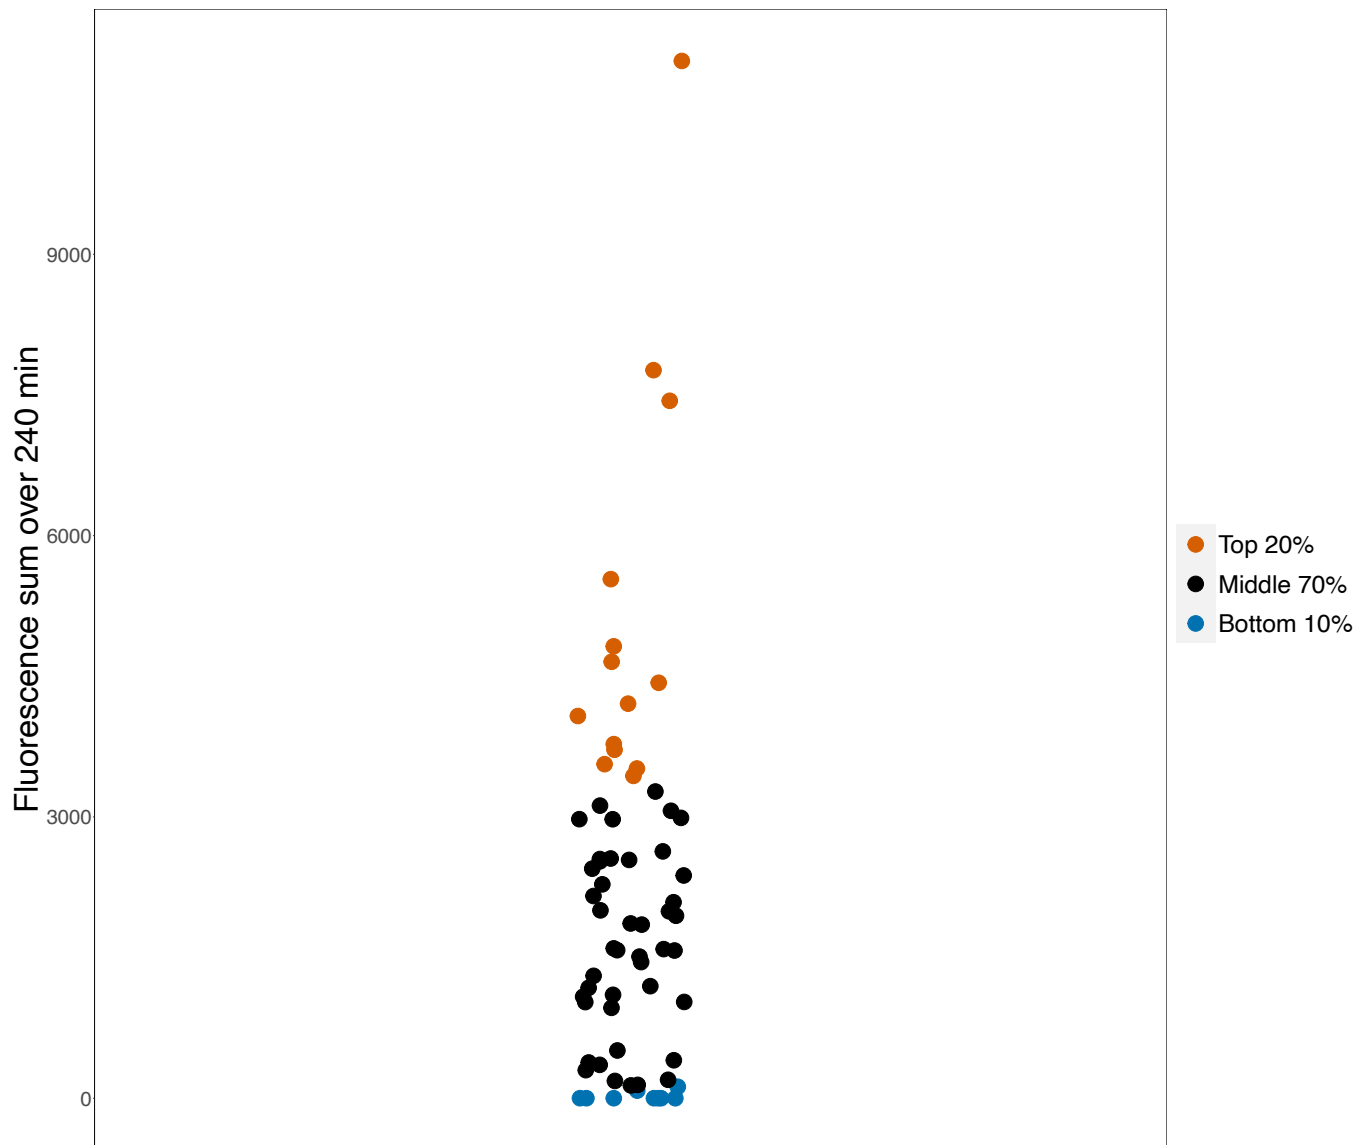

676  
677



678 FIG 5. ACE2 substrate cleavage activity in patients before and after immunoglobulin  
679 depletion. The figure shows ACE2 substrate cleavage activity for 11 patients (4, 5, 9,  
680 11, 13, 15, 27, 43, 44, 47, 48) who had among the top 20% of RFU values and for which  
681 we had sufficient plasma for immunoglobulin depletion, before (blue points) and after  
682 (red points) immunoglobulin depletion by a 100 kDa size exclusion column followed by  
683 protein A/G bead absorption. We also show ACE2 substrate cleavage activity assays  
684 before and after immunoglobulin depletion for pooled patient plasma (PPP) negative  
685 controls and samples from three arbitrarily selected patients, 17, 64, 65, that had among  
686 the bottom 10% of RFU values and had sufficient plasma remaining for the  
687 immunoglobulin depletion protocol. The data suggest that for the 11 patients  
688 demonstrating the highest ACE2 substrate cleavage activity in this cohort, the ACE2  
689 substrate cleavage activity was depleted in an immunoglobulin-associated manner.  
690

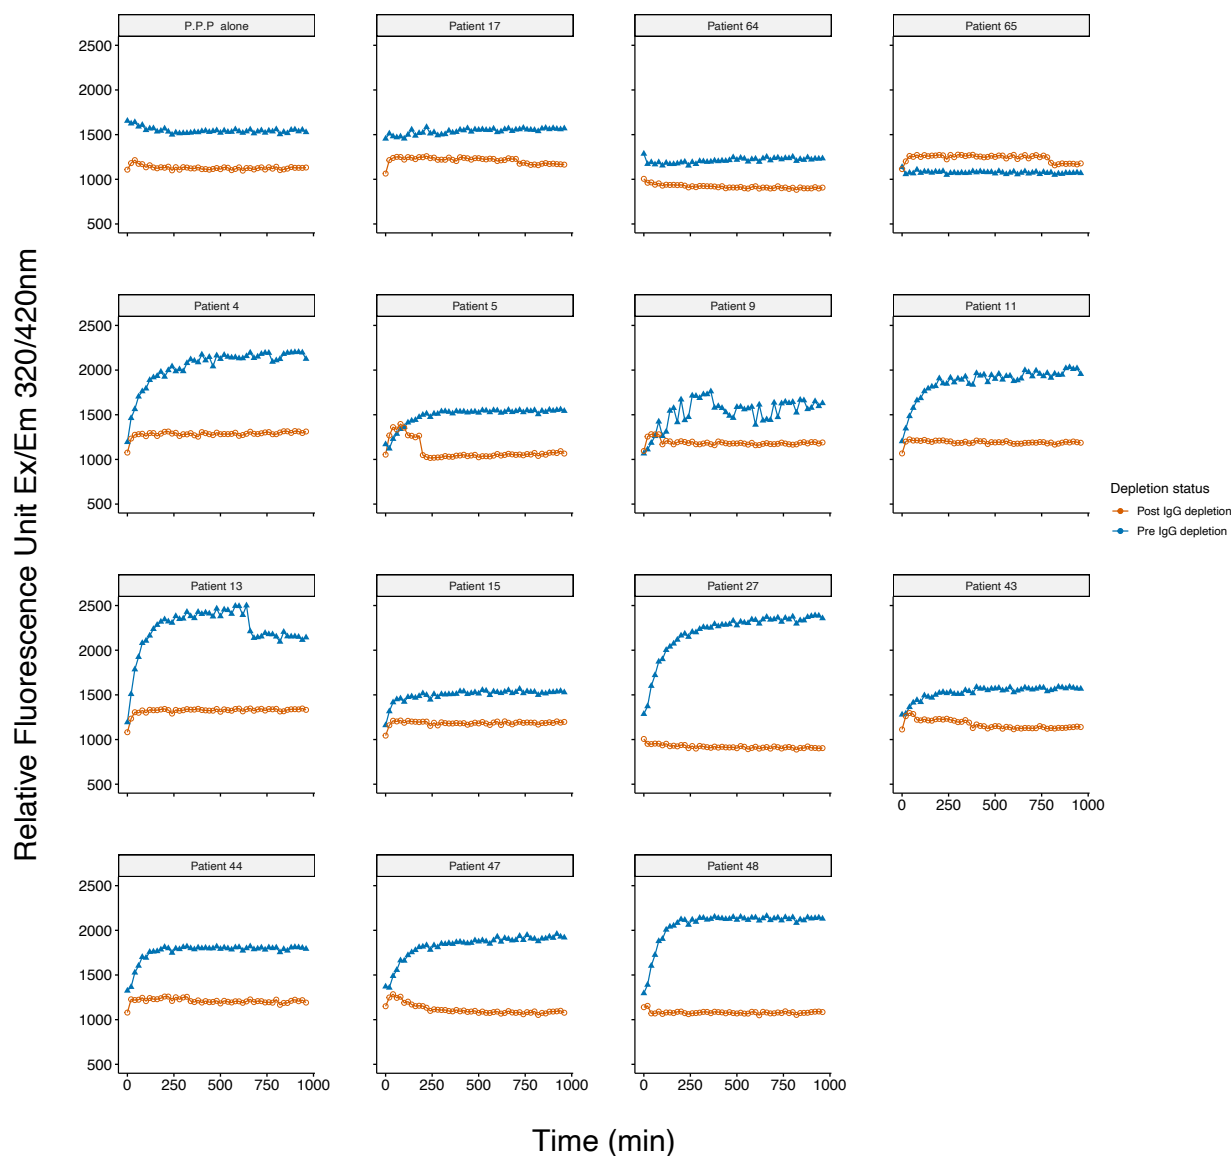

691  
692

693 FIG 6. Correlation of ACE2 substrate cleavage activity (ACE2 Activity) with anti-RBD  
694 antibody (Ab Against RBD) in patient plasma. Anti-RBD antibody concentrations in  
695 plasma samples were determined using ImmunoCAP™ antibody binding assay. The  
696 negative control pooled human plasma is indicated by the red symbol. The patient  
697 plasma samples are indicated in green. The negative control plasma values were  
698 omitted in the calculation of the r- and p-values.  
699  
700

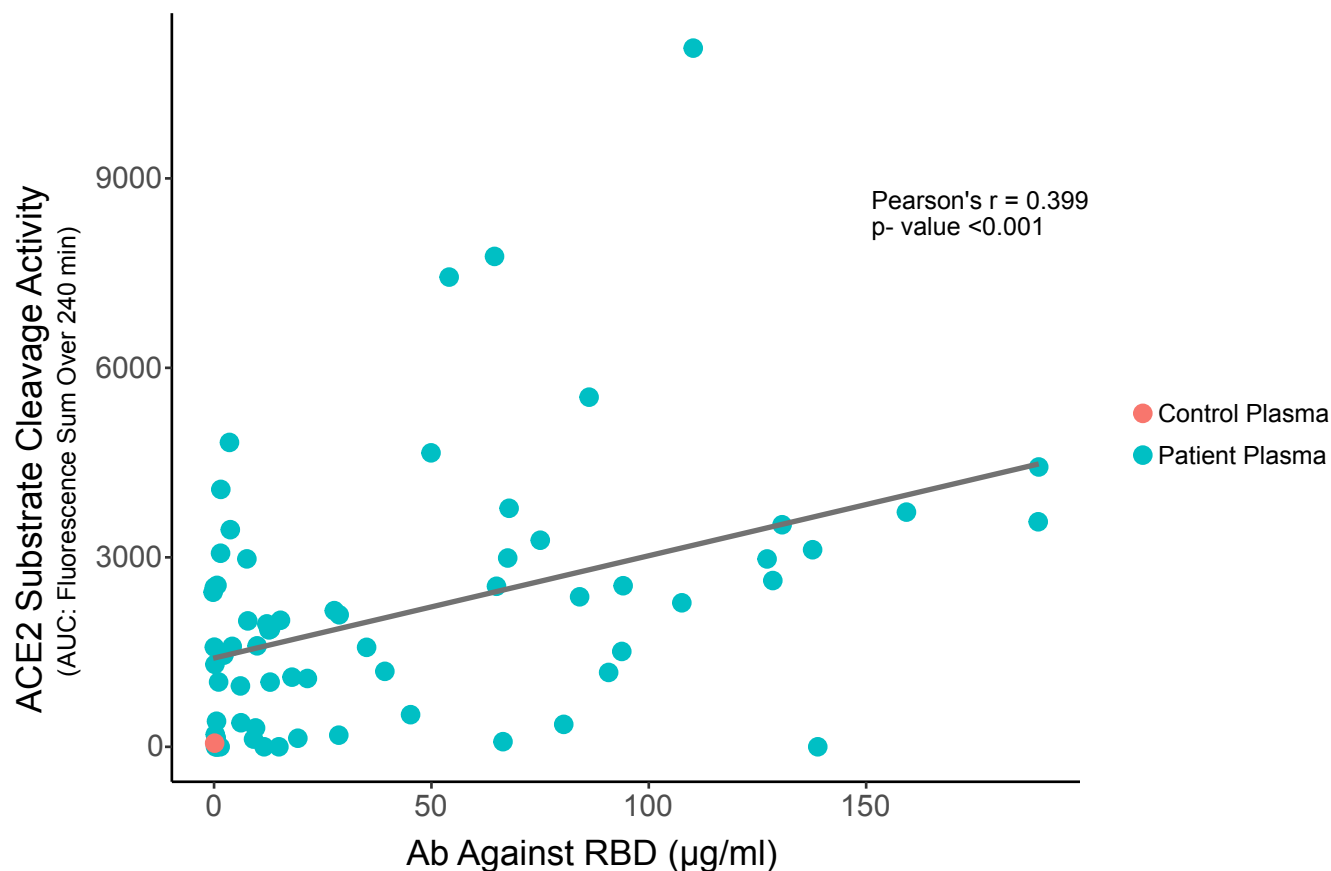

701  
702  
703  
704  
705  
706  
707

## 708 References

- 709 1. Bajema KL, Oster AM, McGovern OL, Lindstrom S, Stenger MR, Anderson TC,  
710 Isenhour C, Clarke KR, Evans ME, Chu VT, Biggs HM, Kirking HL, Gerber SI, Hall AJ,  
711 Fry AM, Oliver SE. Persons Evaluated for 2019 Novel Coronavirus - United States,  
712 January 2020. *MMWR Morb Mortal Wkly Rep.* 2020 Feb 14;69(6):166-70. PMC7017962  
713
- 714 2. Huang C, Wang Y, Li X, Ren L, Zhao J, Hu Y, Zhang L, Fan G, Xu J, Gu X,  
715 Cheng Z, Yu T, Xia J, Wei Y, Wu W, Xie X, Yin W, Li H, Liu M, Xiao Y, Gao H, Guo L,  
716 Xie J, Wang G, Jiang R, Gao Z, Jin Q, Wang J, Cao B. Clinical features of patients  
717 infected with 2019 novel coronavirus in Wuhan, China. *Lancet.* 2020 Feb  
718 15;395(10223):497-506. PMC7159299  
719
- 720 3. Wu Z, McGoogan JM. Characteristics of and Important Lessons From the  
721 Coronavirus Disease 2019 (COVID-19) Outbreak in China: Summary of a Report of  
722 72 314 Cases From the Chinese Center for Disease Control and Prevention. *Jama.*  
723 2020 Apr 7;323(13):1239-42.  
724
- 725 4. Chung TW, Sridhar S, Zhang AJ, Chan KH, Li HL, Wong FK, Ng MY, Tsang RK,  
726 Lee AC, Fan Z, Ho RS, Luk SY, Kan WK, Lam SH, Wu AK, Leung SM, Chan WM, Ng  
727 PY, To KK, Cheng VC, Lung KC, Hung IF, Yuen KY. Olfactory Dysfunction in  
728 Coronavirus Disease 2019 Patients: Observational Cohort Study and Systematic  
729 Review. *Open Forum Infect Dis.* 2020 Jun;7(6):ofaa199. PMC7284010  
730
- 731 5. Liao D, Zhou F, Luo L, Xu M, Wang H, Xia J, Gao Y, Cai L, Wang Z, Yin P, Wang  
732 Y, Tang L, Deng J, Mei H, Hu Y. Haematological characteristics and risk factors in the  
733 classification and prognosis evaluation of COVID-19: a retrospective cohort study.  
734 *Lancet Haematol.* 2020 Sep;7(9):e671-e8. PMC7351397  
735
- 736 6. Del Valle DM, Kim-Schulze S, Huang HH, Beckmann ND, Nirenberg S, Wang B,  
737 Lavin Y, Swartz TH, Madduri D, Stock A, Marron TU, Xie H, Patel M, Tuballes K, Van  
738 Oekelen O, Rahman A, Kovatch P, Aberg JA, Schadt E, Jagannath S, Mazumdar M,  
739 Charney AW, Firpo-Betancourt A, Mendu DR, Jhang J, Reich D, Sigel K, Cordon-Cardo  
740 C, Feldmann M, Parekh S, Merad M, Gnajatic S. An inflammatory cytokine signature  
741 predicts COVID-19 severity and survival. *Nat Med.* 2020 Oct;26(10):1636-43.  
742 PMC7869028  
743
- 744 7. De Rose DU, Pugnali F, Cali M, Ronci S, Caoci S, Maddaloni C, Martini L,  
745 Santisi A, Dotta A, Auriti C. Multisystem Inflammatory Syndrome in Neonates Born to  
746 Mothers with SARS-CoV-2 Infection (MIS-N) and in Neonates and Infants Younger  
747 Than 6 Months with Acquired COVID-19 (MIS-C): A Systematic Review. *Viruses.*  
748 2022;14(4):750.  
749
- 750 8. Yousaf AR, Cortese MM, Taylor AW, Broder KR, Oster ME, Wong JM, Guh AY,  
751 McCormick DW, Kamidani S, Schlaudecker EP, Edwards KM, Creech CB, Staat MA,  
752 Belay ED, Marquez P, Su JR, Salzman MB, Thompson D, Campbell AP. Reported  
753 cases of multisystem inflammatory syndrome in children aged 12-20 years in the USA  
754 who received a COVID-19 vaccine, December, 2020, through August, 2021: a  
755 surveillance investigation. *Lancet Child Adolesc Health.* 2022 Feb 22. PMC8864018

- 756  
757 9. Crook H, Raza S, Nowell J, Young M, Edison P. Long covid-mechanisms, risk  
758 factors, and management. *Bmj*. 2021 Jul 26;374:n1648.  
759
- 760 10. Su Y, Yuan D, Chen, D.G., Ng, R.H., Wang, K., Choi, J., Li, S., Hong, S., Zhang  
761 R, Xie, J., Kornilov, S.A., Scherler, K., Pavlovitch-Bedzyk, A.J., Dong, S., Lausted, C.,  
762 Lee, I., Fallen S, Dai, C.L., Baloni, P., Smith, B., Duvvuri, V.R., Anderson, K.G., Li, J.,  
763 Yang, F., Duncombe, C.J. M, D.J., Rostomily, C., Troisch, P., Zhou, J., Mackay, S.,  
764 DeGottardi, Q., May, D.H., Taniguchi R, Gittelman, R.M, Klinger, M., Snyder, T.M,  
765 Roper, R., Wojciechowska, G., Murray, K., Edmark R, Evans, S., Jones, L., Zhou, Y.,  
766 Rowen, L., Liu, R., Chour, W., Algren, H.A, Berrington,, W.R. W, J.A., Cochran, R.A.,  
767 Micikas, M.E., the ISB-Swedish COVID19 Biobanking Unit, Terri Wrin, Petropoulos,  
768 C.J., Cole, H.R., Fischer, T.D., Wei, W., Hoon, D.S.B., Price, N.D., Subramanian, N.,,  
769 Hill JA, Hadlock, J., Magis, A.T., Ribas, A., Lanier, L.L., Boyd, S.D., Bluestone, J.A.,  
770 Chu, H., Hood,, L. G, R., Greenberg, P.D., Davis, M.M., Goldman, J.D., Heath, J.R.,  
771 Multiple Early Factors Anticipate Post-Acute COVID-19 Sequelae. *Cell*. 2022.  
772
- 773 11. Hanidziar D, Bittner EA. Hypotension, Systemic Inflammatory Response  
774 Syndrome, and COVID-19: A Clinical Conundrum. *Anesth Analg*. 2020  
775 Sep;131(3):e175-e6. PMC7302068  
776
- 777 12. Dani M, Dirksen A, Taraborrelli P, Torocastro M, Panagopoulos D, Sutton R, Lim  
778 PB. Autonomic dysfunction in 'long COVID': rationale, physiology and management  
779 strategies. *Clin Med (Lond)*. 2021 Jan;21(1):e63-e7. PMC7850225  
780
- 781 13. Koudelka M, Sovová E. COVID-19 Causing Hypotension in Frail Geriatric  
782 Hypertensive Patients? *Medicina (Kaunas)*. 2021 Jun 18;57(6). PMC8235779  
783
- 784 14. Hillmeister P, Persson PB. The Kallikrein–Kinin system. *Acta Physiologica*.  
785 2012;206(4):215-9.  
786
- 787 15. Bekassy Z, Lopatko Fagerström I, Bader M, Karpman D. Crosstalk between the  
788 renin-angiotensin, complement and kallikrein-kinin systems in inflammation. *Nat Rev*  
789 *Immunol*. 2022 Jul;22(7):411-28. PMC8579187  
790
- 791 16. Martens CP, Van Mol P, Wauters J, Wauters E, Gangnus T, Noppen B,  
792 Callewaert H, Feyen JHM, Liesenborghs L, Heylen E, Jansen S, Pereira LCV, Kraisin S,  
793 Guler I, Engelen MM, Ockerman A, Van Herck A, Vos R, Vandenbrielle C, Meersseman  
794 P, Hermans G, Wilmer A, Martinod K, Burckhardt BB, Vanhove M, Jacquemin M,  
795 Verhamme P, Neyts J, Vanassche T. Dysregulation of the kallikrein-kinin system in  
796 bronchoalveolar lavage fluid of patients with severe COVID-19. *eBioMedicine*. 2022  
797 2022/09/01/;83:104195.  
798
- 799 17. Carvalho PRd, Sirois P, Fernandes PD. The role of kallikrein-kinin and renin-  
800 angiotensin systems in COVID-19 infection. *Peptides*. 2021 2021/01/01/;135:170428.  
801
- 802 18. Tramontano A, Janda KD, Lerner RA. Catalytic antibodies. *Science*. 1986 Dec  
803 19;234(4783):1566-70.  
804

- 805 19. Pollack SJ, Jacobs JW, Schultz PG. Selective chemical catalysis by an antibody.  
806 Science. 1986 Dec 19;234(4783):1570-3.  
807
- 808 20. Hilvert D. Critical analysis of antibody catalysis. *Annu Rev Biochem.*  
809 2000;69:751-93.  
810
- 811 21. Bar-Even A, Noor E, Savir Y, Liebermeister W, Davidi D, Tawfik DS, Milo R. The  
812 moderately efficient enzyme: evolutionary and physicochemical trends shaping enzyme  
813 parameters. *Biochemistry.* 2011 May 31;50(21):4402-10.  
814
- 815 22. Paul S, Volle DJ, Beach CM, Johnson DR, Powell MJ, Massey RJ. Catalytic  
816 hydrolysis of vasoactive intestinal peptide by human autoantibody. *Science.* 1989 Jun  
817 9;244(4909):1158-62.  
818
- 819 23. Shuster AM, Gololobov GV, Kvashuk OA, Bogomolova AE, Smirnov IV, Gabibov  
820 AG. DNA hydrolyzing autoantibodies. *Science.* 1992 May 1;256(5057):665-7.  
821
- 822 24. Paul S, Li L, Kalaga R, Wilkins-Stevens P, Stevens FJ, Solomon A. Natural  
823 catalytic antibodies: peptide-hydrolyzing activities of Bence Jones proteins and VL  
824 fragment. *J Biol Chem.* 1995 Jun 23;270(25):15257-61.  
825
- 826 25. Thiagarajan P, Dannenbring R, Matsuura K, Tramontano A, Gololobov G, Paul S.  
827 Monoclonal antibody light chain with prothrombinase activity. *Biochemistry.* 2000 May  
828 30;39(21):6459-65.  
829
- 830 26. Wootla B, Dasgupta S, Dimitrov JD, Bayry J, Lévesque H, Borg JY, Borel-Derlon  
831 A, Rao DN, Friboulet A, Kaveri SV, Lacroix-Desmazes S. Factor VIII hydrolysis  
832 mediated by anti-factor VIII autoantibodies in acquired hemophilia. *J Immunol.* 2008 Jun  
833 1;180(11):7714-20.  
834
- 835 27. Lacroix-Desmazes S, Moreau A, Sooryanarayana, Bonnemain C, Stieltjes N,  
836 Pashov A, Sultan Y, Hoebeke J, Kazatchkine MD, Kaveri SV. Catalytic activity of  
837 antibodies against factor VIII in patients with hemophilia A. *Nat Med.* 1999  
838 Sep;5(9):1044-7.  
839
- 840 28. Ponomarenko NA, Durova OM, Vorobiev, II, Belogurov AA, Jr., Kurkova IN,  
841 Petrenko AG, Telegin GB, Suchkov SV, Kiselev SL, Lagarkova MA, Govorun VM,  
842 Serebryakova MV, Avalle B, Tornatore P, Karavanov A, Morse HC, 3rd, Thomas D,  
843 Friboulet A, Gabibov AG. Autoantibodies to myelin basic protein catalyze site-specific  
844 degradation of their antigen. *Proc Natl Acad Sci U S A.* 2006 Jan 10;103(2):281-6.  
845 PMC1324791  
846
- 847 29. Ponomarenko NA, Vorobiev, II, Alexandrova ES, Reshetnyak AV, Telegin GB,  
848 Khaidukov SV, Avalle B, Karavanov A, Morse HC, 3rd, Thomas D, Friboulet A, Gabibov  
849 AG. Induction of a protein-targeted catalytic response in autoimmune prone mice:  
850 antibody-mediated cleavage of HIV-1 glycoprotein GP120. *Biochemistry.* 2006 Jan  
851 10;45(1):324-30.  
852

- 853 30. Avalle B, Mistro D, Thomas D, Friboulet A. Polyclonal catalytic anti-idiotypic  
854 antibodies with a beta-lactamase activity. *Ann N Y Acad Sci.* 1996 Oct 12;799:172-5.  
855
- 856 31. Friboulet A, Izadyar L, Avalle B, Roseto A, Thomas D. Abzyme generation using  
857 an anti-idiotypic antibody as the "internal image" of an enzyme active site. *Appl*  
858 *Biochem Biotechnol.* 1994 May-Jun;47(2-3):229-37; discussion 37-9.  
859
- 860 32. Izadyar L, Friboulet A, Remy MH, Roseto A, Thomas D. Monoclonal anti-idiotypic  
861 antibodies as functional internal images of enzyme active sites: production of a catalytic  
862 antibody with a cholinesterase activity. *Proc Natl Acad Sci U S A.* 1993 Oct  
863 1;90(19):8876-80. PMC47463  
864
- 865 33. Friboulet A, Izadyar L, Avalle B, Roseto A, Thomas D. Antiidiotypic antibodies as  
866 functional internal images of enzyme-active sites. *Ann N Y Acad Sci.* 1995 Mar  
867 31;750:265-70.  
868
- 869 34. Ponomarenko NA, Pillet D, Paon M, Vorobiev, II, Smirnov IV, Adenier H, Avalle  
870 B, Kolesnikov AV, Kozyr AV, Thomas D, Gabibov AG, Friboulet A. Anti-idiotypic  
871 antibody mimics proteolytic function of parent antigen. *Biochemistry.* 2007 Dec  
872 18;46(50):14598-609.  
873
- 874 35. Brooks B, Tancredi C, Song Y, Mogus AT, Huang M-LW, Zhu H, Phan TL, Zhu  
875 H, Kadl A, Woodfolk J. Epstein–Barr Virus and Human Herpesvirus-6 Reactivation in  
876 Acute COVID-19 Patients. *Viruses.* 2022;14(9):1872.  
877
- 878 36. García-Escobar A, Vera-Vera S, Jurado-Román A, Jiménez-Valero S, Galeote G,  
879 Moreno R. Calcium Signaling Pathway Is Involved in the Shedding of ACE2 Catalytic  
880 Ectodomain: New Insights for Clinical and Therapeutic Applications of ACE2 for COVID-  
881 19. *Biomolecules.* 2022 Jan 5;12(1). PMC8774087  
882
- 883 37. Arthur JM, Forrest JC, Boehme KW, Kennedy JL, Owens S, Herzog C, Liu J,  
884 Harville TO. Development of ACE2 autoantibodies after SARS-CoV-2 infection. *PLoS*  
885 *One.* 2021;16(9):e0257016. PMC8415618  
886
- 887 38. Tanna A, Guarino L, Tam FWK, Rodriguez-Cubillo B, Levy JB, Cairns TD, Griffith  
888 M, Tarzi RM, Caplin B, Salama AD, Cook T, Pusey CD. Long-term outcome of anti-  
889 neutrophil cytoplasm antibody-associated glomerulonephritis: evaluation of the  
890 international histological classification and other prognostic factors. *Nephrology Dialysis*  
891 *Transplantation.* 2014;30(7):1185-92.  
892
- 893 39. Xiao F, Burns KD. Measurement of angiotensin converting enzyme 2 activity in  
894 biological fluid (ACE2). *Hypertension: Springer;* 2017. p. 101-15.
- 895 40. Keshavarz B, Wiencek JR, Workman LJ, Straesser MD, Muehling LM, Canderan  
896 G, Drago F, Bonham CA, Sturek JM, Ramani C, McNamara CA, Woodfolk JA, Kadl A,  
897 Platts-Mills TAE, Wilson JM. Quantitative Measurement of IgG to Severe Acute  
898 Respiratory Syndrome Coronavirus-2 Proteins Using ImmunoCAP. *Int Arch Allergy*  
899 *Immunol.* 2021;182(5):417-24. PMC8018212  
900



901 41. McConnell SA, Sachithanandham J, Mudrak NJ, Zhu X, Farhang PA, Cordero  
902 RJB, Wear MP, Shapiro JR, Park HS, Klein SL, Tobian AAR, Bloch EM, Sullivan DJ,  
903 Pekosz A, Casadevall A. Spike-protein proteolytic antibodies in COVID-19 convalescent  
904 plasma contribute to SARS-CoV-2 neutralization. Cell Chem Biol. 2023 Jul  
905 20;30(7):726-38.e4. PMC10288624  
906  
907
